# Supplementary material for: Diagnostic biomarkers and potential treatment targets for Ankylosing Spondylitis
Source: Research Square preprint supplement (doi:10.21203/rs.3.rs-3336867/v1), 2023-09-14
Supplement: Supplementary file 1 [file 71f6f9a7ff9c3b397524ed84.pdf]

**Sup\_Table 1. The primer sequences for the genes**

| <b>Genes</b>     | <b>Primer sequences</b>          | <b>Product length</b> |
|------------------|----------------------------------|-----------------------|
| <b>IL2RB-F</b>   | 5'-GGTGAACCAAACCTGTGAGCT-3'      | 110 bp                |
| <b>IL2RB-R</b>   | 5'-GGTGACGATGTCAACTGTGGTC-3'     |                       |
| <b>CD247-F</b>   | 5'-GCCAGAACCAGCTCTATAACG-3'      | 75 bp                 |
| <b>CD247-R</b>   | 5'-GGCCACGTCTCTTGTCCAA-3'        |                       |
| <b>PLEKHF1-F</b> | 5' – GGTGTGGACTCGAGGGCT – 3'     | 203 bp                |
| <b>PLEKHF1-R</b> | 5' – CTTCTTGCGGCACTCTTTGG – 3'   |                       |
| <b>EOMES-F</b>   | 5' – CGGCCTCTGTGGCTCAA – 3'      | 76 bp                 |
| <b>EOMES-R</b>   | 5' – AAGGAAACATGCGCCTGC – 3'     |                       |
| <b>S1PR5-F</b>   | 5' – AGGGCGCAGACCTTGG – 3'       | 104 bp                |
| <b>S1PR5-R</b>   | 5' – GGAGCTTGCCGGTGTAGTT – 3'    |                       |
| <b>FGFBP2-F</b>  | 5' – TGGGAACATTGTTGGAAACC – 3'   | 112 bp                |
| <b>FGFBP2-R</b>  | 5' – GGTTGTCTGTCAGGGAGAGG – 3'   |                       |
| <b>GAPDH-F</b>   | 5' – TCCTCTGACTTCAACAGCGACA – 3' | 72 bp                 |
| <b>GAPDH-R</b>   | 5' – GTGGTCGTTGAGGGCAATG – 3'    |                       |

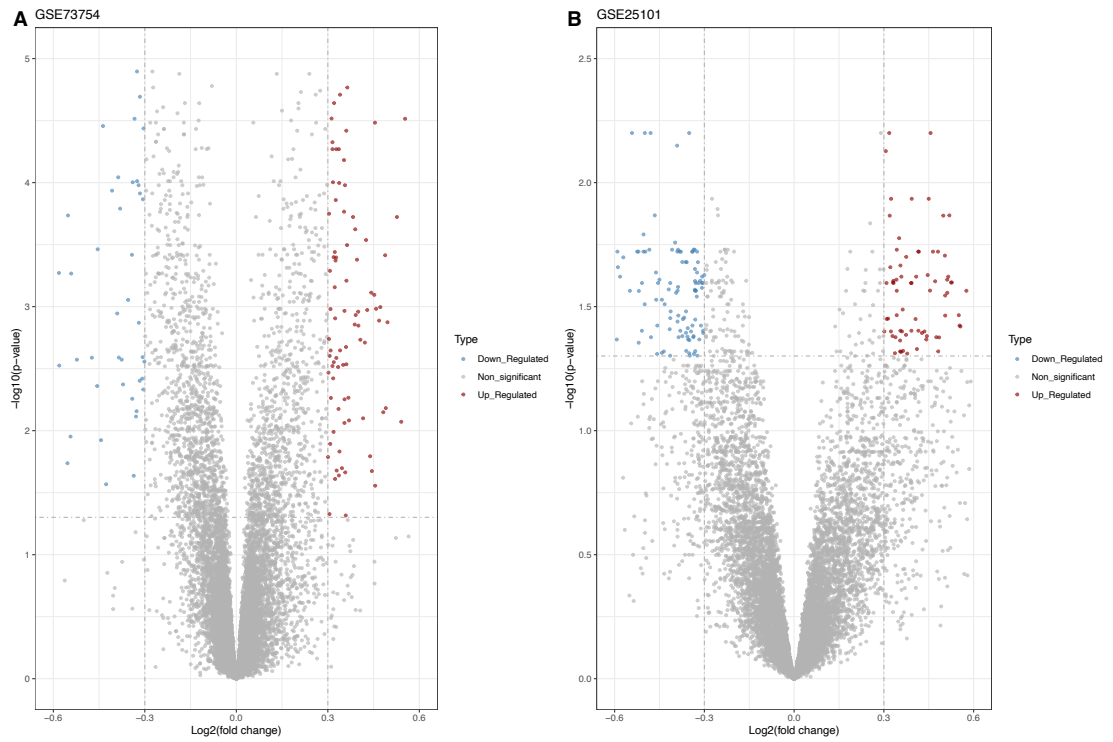

Sup\_Figure 1. Volcano map of GSE73754 (1A) and GSE25101 (1B).

Volcano plots are shown for differentially expressed genes (DEGs) between AS and healthy patients in GSE73754(1A) and GSE25101 (1B). Absolute logFC  $\geq 0.3$  and adj.P.Val  $> 0.05$  are set as cutoff point.

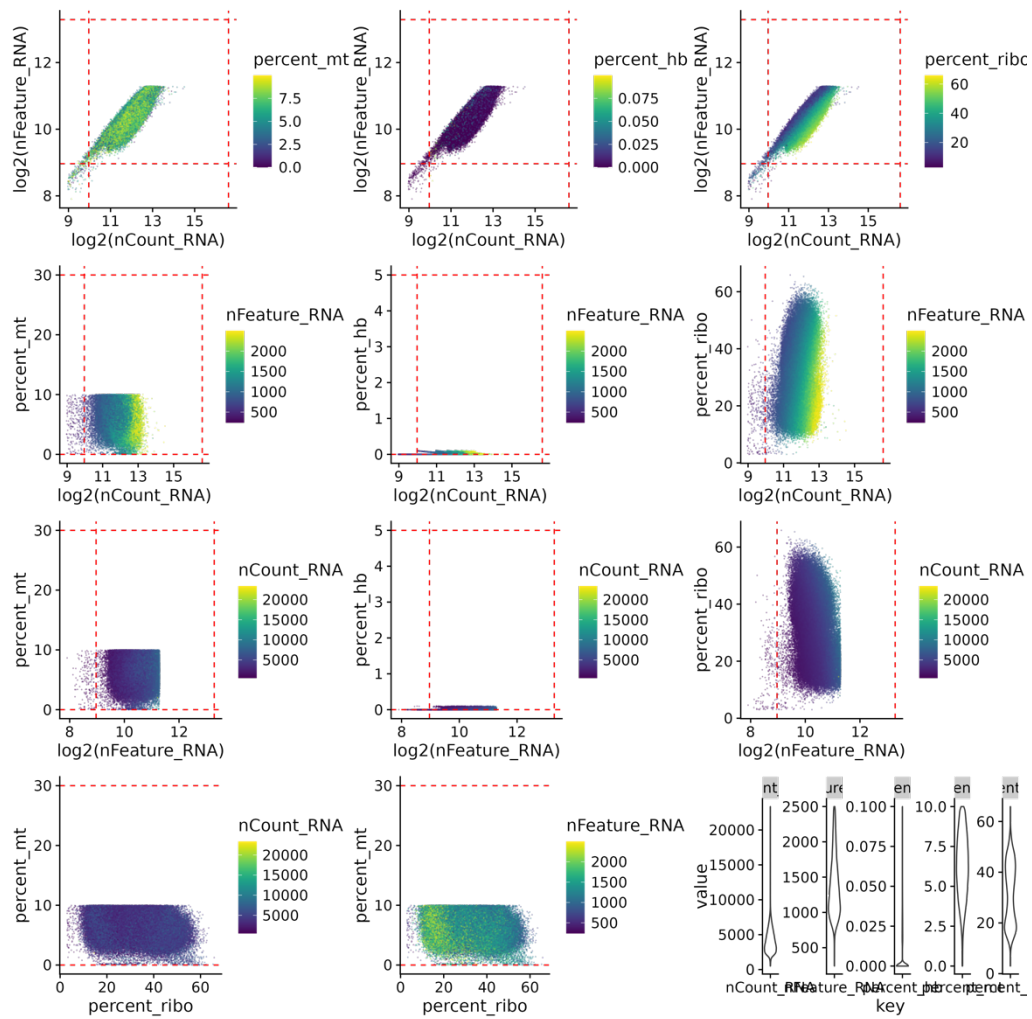

Sup\_Figure 2. The data from GSE194315 used standard Seurat pipeline to filter out low-quality cells based on (1) genes expressed < 200 or > 2500; (2) mitochondrial-associated genes expressed > 10%.

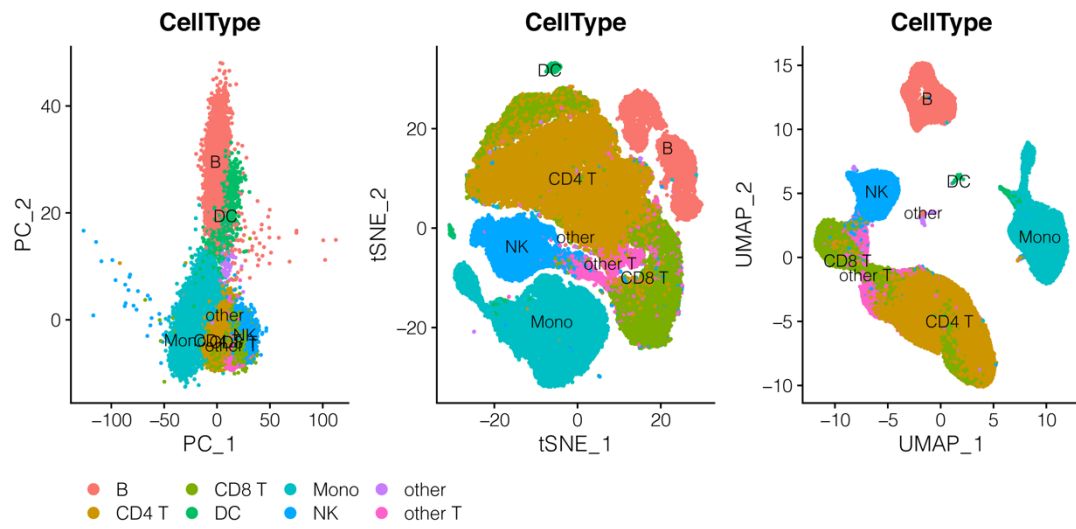

Sup\_Figure 3. Different cell populations of PBMC was analyzed by PCA, tSNE and UMAP method; All cells were divided into 8 cell subpopulations, including B cells, CD8 T cells, monocyte cells, CD4 T cells, DC cells, NK cells, other T cells and other cells.

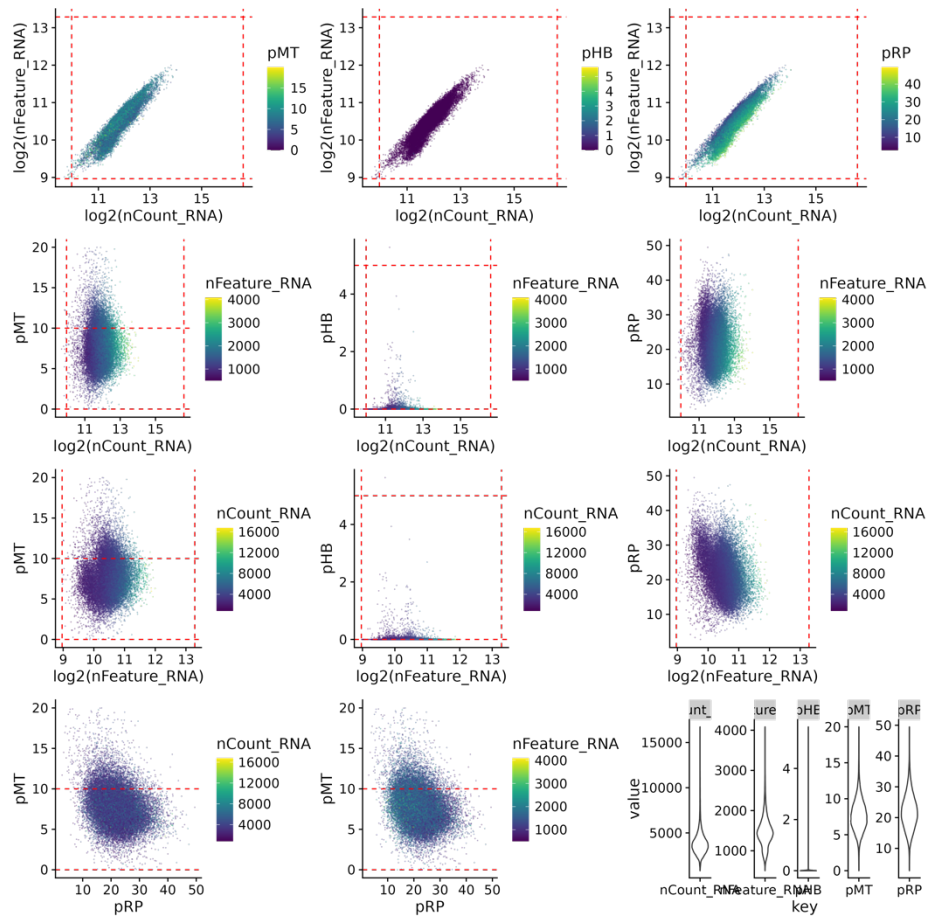

Sup\_Figure 4. Another data using the standard Seurat pipeline filtered out low quality cells based on (1) gene expression  $<200$  or  $>2500$ ; and (2) mitochondria-related gene expression  $>10\%$ .
